# Supplementary material for: Effective Nose-to-Brain Delivery of Blood-Brain Barrier Impermeant Anti-IL-1β Antibody via the Minimally Invasive Nasal Depot (MIND) Technique
Source: PubMed Central journal article supplement — ACS Appl Mater Interfaces. 2024 Dec 10;16(50):69103–13. doi: 10.1021/acsami.4c18679 (PMC11660045; doi:10.1021/acsami.4c18679), 2024-12-10
Supplement: am4c18679_si_001.pdf [file am4c18679_si_001.pdf]

## SUPPORTING INFORMATION

### Effective Nose-to-Brain Delivery of Blood-Brain Barrier Impermeant Anti-IL-1 $\beta$ Antibody via the Minimally Invasive Nasal Depot (MIND) Technique

Valentina Di Francesco<sup>1,2</sup>, Andy J. Chua<sup>1,3</sup>, Benjamin S. Bleier<sup>2</sup>, and Mansoor M. Amiji<sup>1,4\*</sup>

<sup>1</sup> Department of Pharmaceutical Sciences, School of Pharmacy and Pharmaceutical Sciences, Northeastern University, 360 Huntington Avenue, Boston, 140 The Fenway Building, Massachusetts, 02115.

<sup>2</sup> Department of Otolaryngology, Massachusetts Eye and Ear Infirmary, Harvard Medical School, 243 Charles Street, Boston, Massachusetts 02114.

<sup>3</sup> Department of Otorhinolaryngology – Head and Neck Surgery, Sengkang General Hospital, 110 Sengkang E Way, Singapore 544886

<sup>4</sup> Department of Chemical Engineering, College of Engineering, Northeastern University, 360 Huntington Avenue, 140 The Fenway Building, Boston, Massachusetts, 02115.

**\*Corresponding author:** Mansoor M. Amiji, PhD; E-mail: [m.amiji@northeastern.edu](mailto:m.amiji@northeastern.edu);

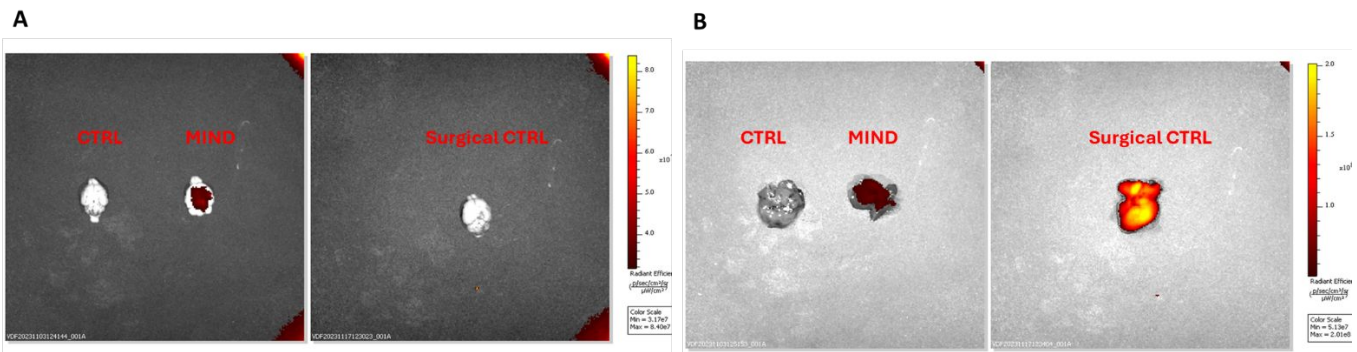

**Figure S1.** Qualitative analysis of Cy5-IL-1b uptake in distinct anatomical regions, specifically brain (A) and liver (B), within three groups: CTRL, MIND, and Surgical CTRL.

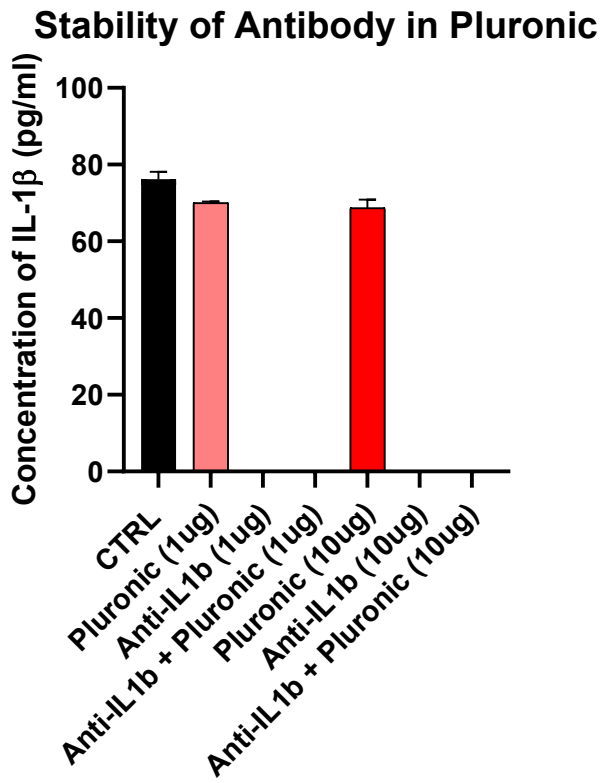

Figure S2. Stability of the Antibody in Pluronic, n=3.
